# Supplementary material for: Nucleic acid binding study of surfactant copper(ii) complex containing dipyrido[3,2-a:2′-3′-c]phenazine ligand as an intercalator: in vitro antitumor activity of complex in human liver carcinoma (HepG2) cancer cells
Source: Royal Society of Chemistry journal article supplement (doi:10.1039/c4ra08049a), 2014-01-01
Supplement: c4ra08049a1.pdf [file c4ra08049a1.pdf]

1

2

## Supplementary Materials

3

4

5

6

7

8

9

10

11

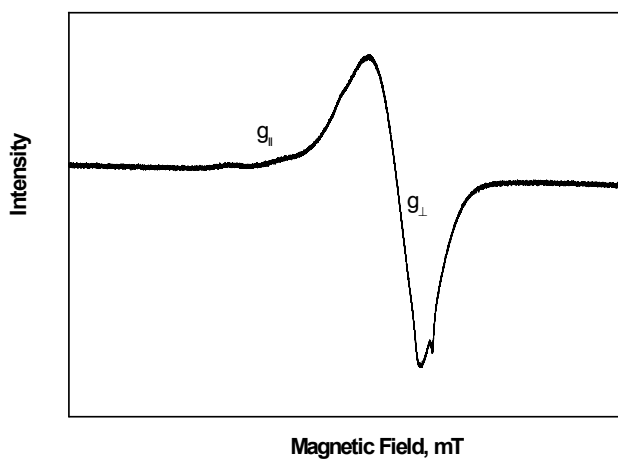

12

13

**SI Fig. 1** EPR spectrum of  $\text{Cu}(\text{dppz})_2\text{DA}](\text{ClO}_4)_2$  in liquid nitrogen temperature

14

15

16

17

18

19

20

21

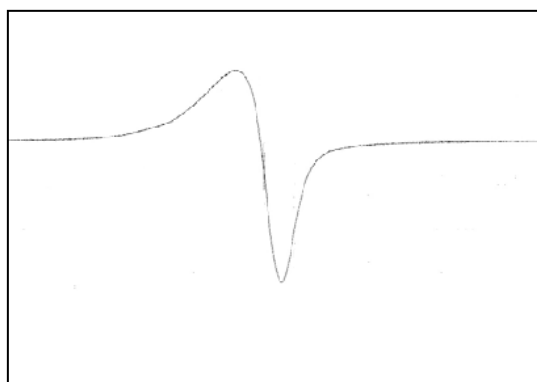

22

23

24

**SI Fig. 2** EPR spectrum of  $\text{Cu}(\text{dppz})_2\text{DA}](\text{ClO}_4)_2$  in Room temperature

25

26

27

28

29

30

31

32

33

34

35

36

37

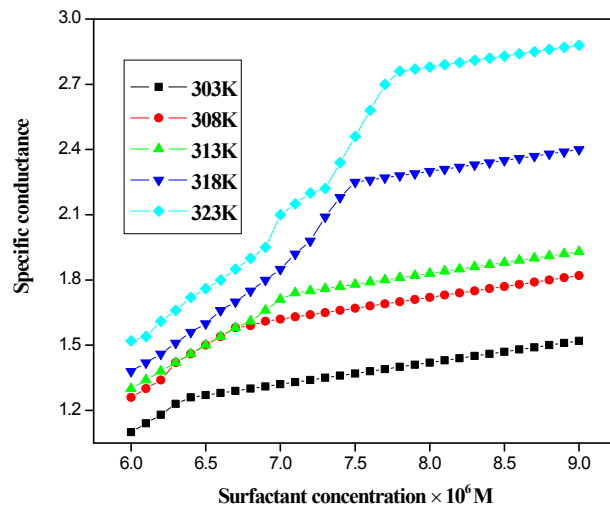

38 **SI Fig. 3** Electrical conductivity vs. surfactant copper(II) complex concentration for aqueous  $[\text{Cu}(\text{dppz})_2\text{DA}](\text{ClO}_4)_2$  solutions

39

40

41

42

43

44

45

46

47

48

49

50

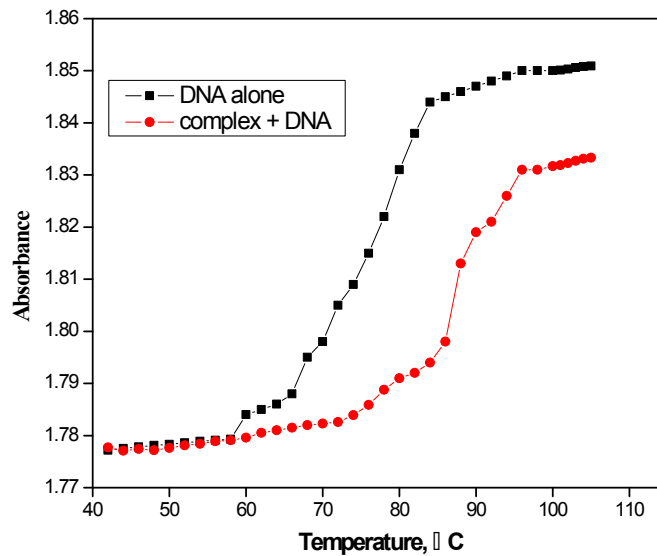

49 **SI Fig. 4** DNA melting curves at 260 nm in the absence and presence of complex at  $8 \mu\text{M}$ ;  $[\text{DNA}] = 80 \mu\text{M}$ .

51

52

53

54

55

56

57

58

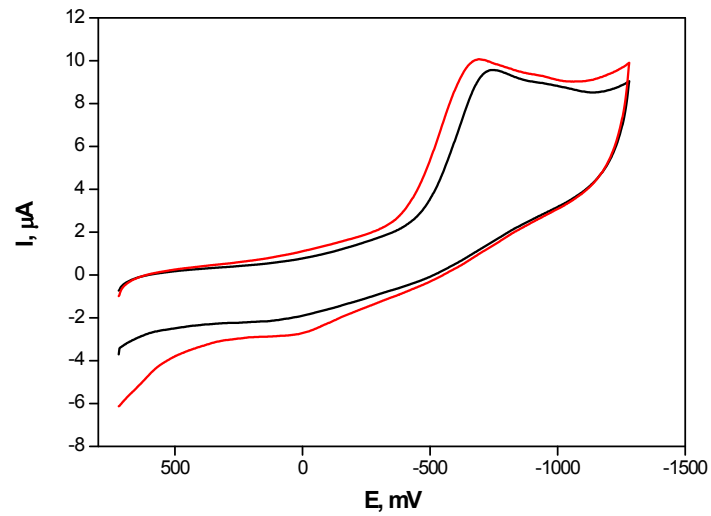

59

60

61

62 **SI Fig. 5** CV spectra of Surfactant copper(II) complex in the absence (black line) and in the presence (red line) of DNA;

63

$$[\text{complex}] = 1 \times 10^{-3} \text{ M}; [\text{DNA}] = 0 - 2.68 \times 10^{-5} \text{ M}$$

64

65

66

67

68

69

70

71

72

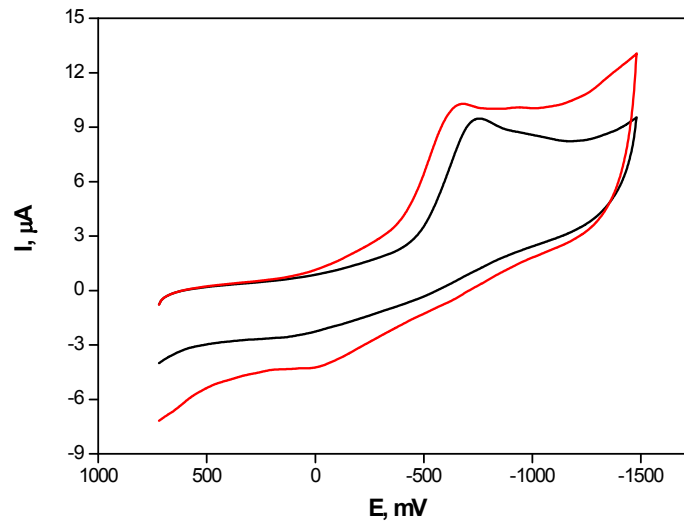

73

74 **SI Fig. 6** CV spectra of Surfactant copper(II) complex in the absence (black line) and in the presence (red line) of RNA;

75

$$[\text{complex}] = 1 \times 10^{-3} \text{ M}; [\text{RNA}] = 0 - 2.68 \times 10^{-5} \text{ M}$$

76

77

78

79

80

81

82

83

84

85

86 **SI Fig. 7** Effects of increasing amounts of presence complex on the relative viscosities of Nucleic acids at 29.0 ( $\pm 0.1$ ) $^{\circ}$ C.

87

88 **SI Table 1.** CMC values of the surfactant copper(II) complex  $[\text{Cu}(\text{dppz})_2\text{DA}](\text{ClO}_4)_2$  in aqueous solution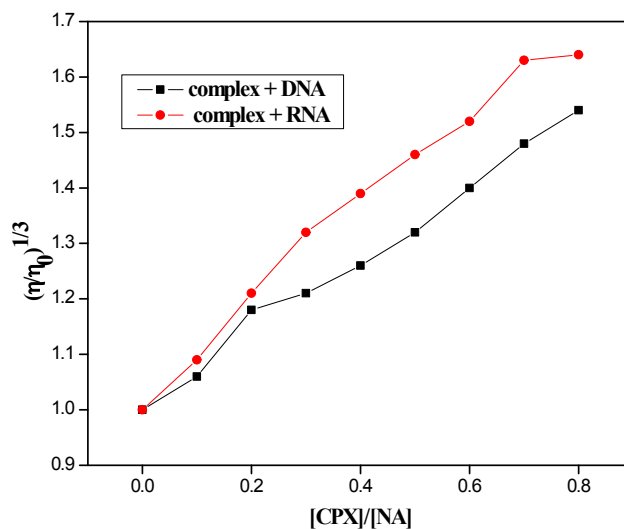

| Temperature | CMC $\times 10^6$ | $-\Delta G_{\text{mic}}^0$ (kJ mol <sup>-1</sup> ) | $-\Delta H_{\text{mic}}^0$ (kJ mol <sup>-1</sup> ) | $T\Delta S_{\text{mic}}^0$ (kJ mol <sup>-1</sup> ) |
|-------------|-------------------|----------------------------------------------------|----------------------------------------------------|----------------------------------------------------|
| 303K        | 6.41 $\pm$ 0.1    | 59.29 $\pm$ 0.4                                    | 13.07 $\pm$ 0.1                                    | 46.22 $\pm$ 0.1                                    |
| 308K        | 6.86 $\pm$ 0.1    | 60.32 $\pm$ 0.3                                    | 13.59 $\pm$ 0.1                                    | 46.72 $\pm$ 0.4                                    |
| 313K        | 7.10 $\pm$ 0.2    | 60.99 $\pm$ 0.3                                    | 14.01 $\pm$ 0.3                                    | 46.98 $\pm$ 0.2                                    |
| 318K        | 7.50 $\pm$ 0.4    | 61.29 $\pm$ 0.1                                    | 14.37 $\pm$ 0.2                                    | 46.92 $\pm$ 0.2                                    |
| 323K        | 7.81 $\pm$ 0.1    | 62.36 $\pm$ 0.1                                    | 14.90 $\pm$ 0.2                                    | 47.46 $\pm$ 0.1                                    |

89

90

91

92

93
